# Supplementary material for: Adherence to UNRWA’s anaemia treatment guidelines in the Jerash Camp Health Centre, Jordan: a retrospective observational study
Source: HighWire-hosted journal article supplement (doi:10.1136/bmjopen-2021-056490), 2022-03-01
Supplement: bmjopen-2021-056490supp002_data_supplement.pdf [file bmjopen-2021-056490supp002_data_supplement.pdf]

**Additional file 2. Data collected for each child from the electronic health records**

| Collected data                                      | Stage of information                                                                  |
|-----------------------------------------------------|---------------------------------------------------------------------------------------|
| 1 Children aged 12 months old in 2018               | Screening visit                                                                       |
| 2 Children who visited the health center            | Screening visits, 1 <sup>st</sup> , 2 <sup>nd</sup> , 3 <sup>rd</sup> follow-up visit |
| 3 Age in months of health center visits             | Screening visits, 1 <sup>st</sup> , 2 <sup>nd</sup> , 3 <sup>rd</sup> follow-up visit |
| 4 Children who took the Hb test                     | Screening visits, 1 <sup>st</sup> , 2 <sup>nd</sup> , 3 <sup>rd</sup> follow-up visit |
| 5 Children's Hb level                               | Screening visits, 1 <sup>st</sup> , 2 <sup>nd</sup> , 3 <sup>rd</sup> follow-up visit |
| 6 Children who took other laboratory tests          | 1 <sup>st</sup> , 2 <sup>nd</sup> , 3 <sup>rd</sup> follow-up visit                   |
| 7 Children who were prescribed the iron supplements | Screening visits, 1 <sup>st</sup> , 2 <sup>nd</sup> , 3 <sup>rd</sup> follow-up visit |
