# Supplementary material for: Adherence to UNRWA’s anaemia treatment guidelines in the Jerash Camp Health Centre, Jordan: a retrospective observational study
Source: HighWire-hosted journal article supplement (doi:10.1136/bmjopen-2021-056490), 2022-03-01
Supplement: bmjopen-2021-056490supp003_data_supplement.pdf [file bmjopen-2021-056490supp003_data_supplement.pdf]

## Additional file 3. Case definition of electronic health record

### 1. Patient adherence by health center visits (%)

$$\text{Screening visit} = \frac{\text{Number of children at the screening visit}}{\text{Number of children aged 12 months old}} \times 100$$

$$1^{\text{st}} \text{ follow-up visit} = \frac{\text{Number of children at the 1st follow-up visit}}{\text{Number of moderate to severely anemic children at the screening visit}} \times 100$$

$$2^{\text{nd}} \text{ follow-up visit} = \frac{\text{Number of children at the 2nd follow-up visit}}{\text{Number of children who improved their Hb level}} \times 100$$

$$3^{\text{rd}} \text{ follow-up visit} = \frac{\text{Number of children at the 3rd follow-up visit}}{\text{Number of mildly anemic or non-anemic children at the 2nd follow-up visit}} \times 100$$

### 2. Doctor adherence by Hb tests (%)

$$\text{Screening visit} = \frac{\text{Number of children receiving Hb tests at the screening visit}}{\text{Number of children at the screening visit}} \times 100$$

$$1^{\text{st}} \text{ follow-up visit} = \frac{\text{Number of children receiving Hb tests at the 1st follow-up visit}}{\text{Number of children at the 1st follow-up visit}} \times 100$$

$$2^{\text{nd}} \text{ follow-up visit} = \frac{\text{Number of children receiving Hb tests at the 2nd follow-up visit}}{\text{Number of children at the 2nd follow-up visit}} \times 100$$

$$3^{\text{rd}} \text{ follow-up visit} = \frac{\text{Number of children receiving Hb tests at the 3rd follow-up visit}}{\text{Number of children at the 3rd follow-up visit}} \times 100$$

### 3. Doctor adherence by iron supplementation (%)

$$\text{Screening visit} = \frac{\text{Number of children receiving iron supplements at the screening visit}}{\text{Number of moderate to severely anemic children at the screening visit}} \times 100$$

$$1^{\text{st}} \text{ follow-up visit} = \frac{\text{Number of children receiving iron supplements at the 1st follow-up visit}}{\text{Number of children with increased Hb level at the 1st follow-up visit}} \times 100$$

Doctor adherence to iron supplementation for the 2<sup>nd</sup> and 3<sup>rd</sup> follow-up visits was not defined because children should not receive iron supplements at the 2<sup>nd</sup> and 3<sup>rd</sup> follow-ups visits, as defined in the UNRWA guidelines.
