# Supplementary figures and images for: Adherence to UNRWA’s anaemia treatment guidelines in the Jerash Camp Health Centre, Jordan: a retrospective observational study
Source: HighWire-hosted journal article supplement (doi:10.1136/bmjopen-2021-056490), 2022-03-01

**Additional file 1. Flow chart of the UNRWA guidelines**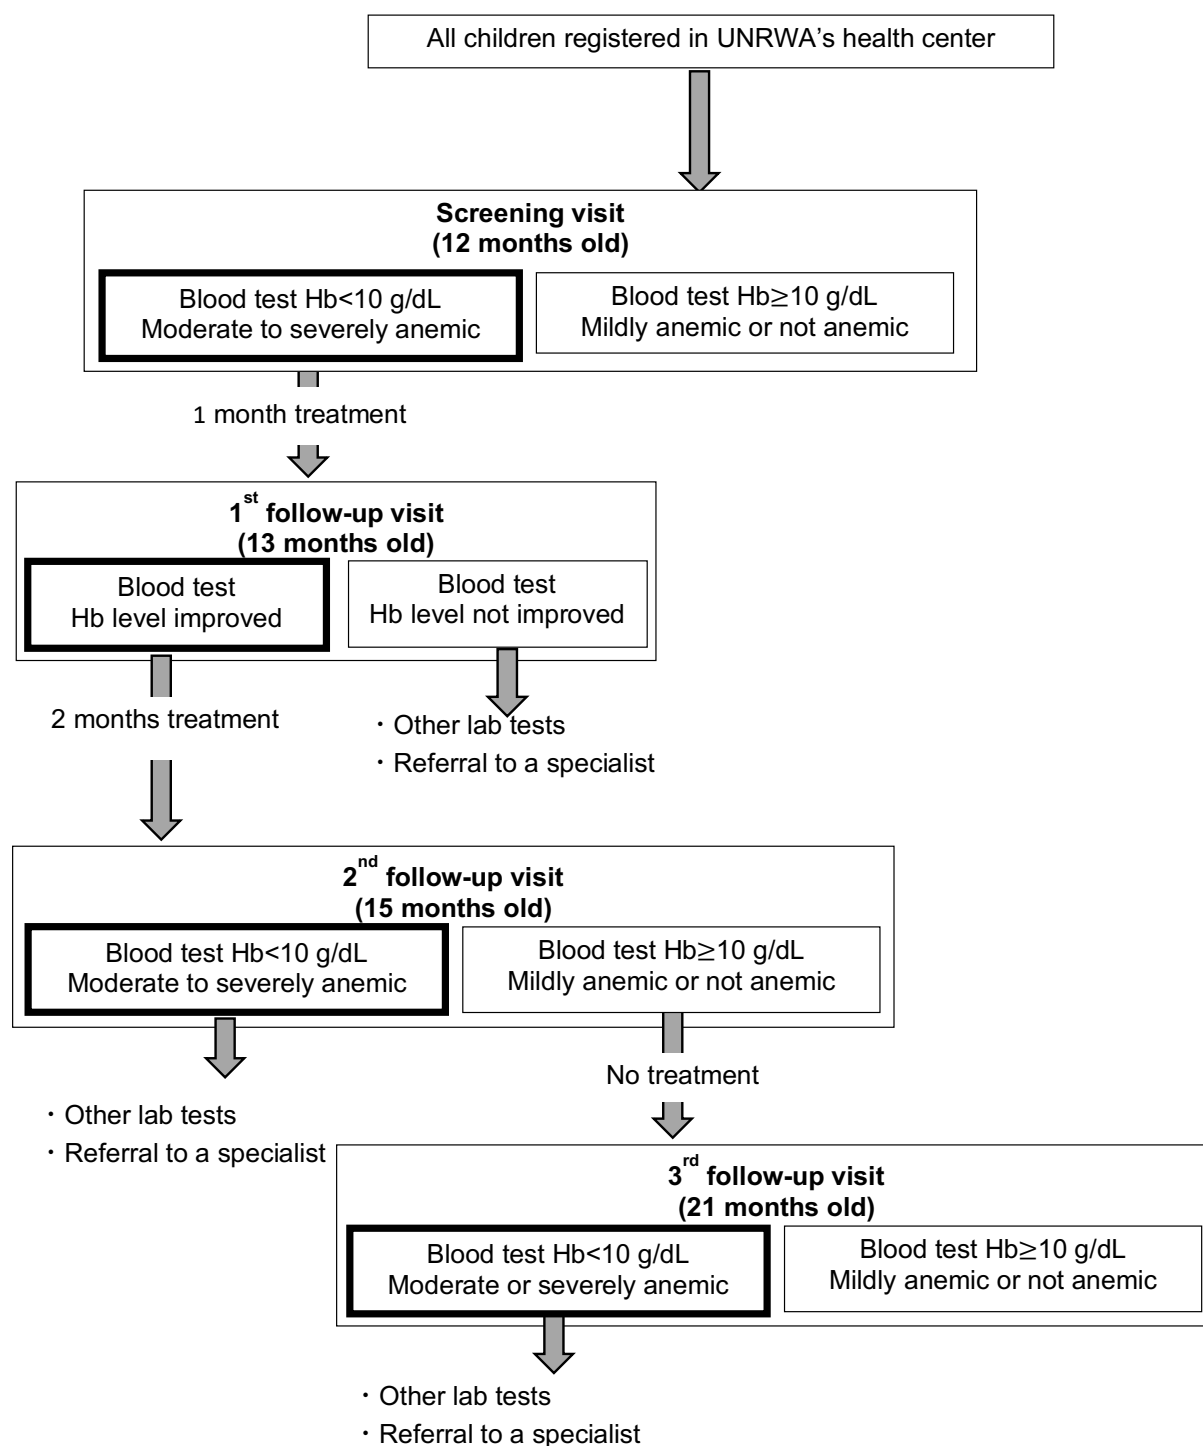

Supplement: bmjopen-2021-056490supp001_data_supplement.pdf [file bmjopen-2021-056490supp001_data_supplement.pdf]
